# Supplementary material for: TiO2(B)–CNT–graphene ternary composite anode material for lithium ion batteries
Source: Royal Society of Chemistry journal article supplement (doi:10.1039/c5ra01337b), 2015-01-01
Supplement: c5ra01337b1.pdf [file c5ra01337b1.pdf]

Supplementary Information for

**TiO<sub>2</sub>(B)-CNT-graphene ternary composite anode material for  
lithium ion batteries**

Tao Shen,<sup>a,b</sup> Xufeng Zhou,<sup>\*a</sup> Hailiang Cao,<sup>a</sup> Chao Zheng,<sup>a</sup> Zhaoping Liu,<sup>\*a</sup>

*<sup>a</sup>Ningbo Institute of Materials Technology and Engineering, Chinese Academy of  
Sciences, Zhejiang 315201, P. R. China.*

*<sup>b</sup>The School of Material Science and Chemical Engineering, Ningbo University,  
Zhejiang 315211, P. R. China*

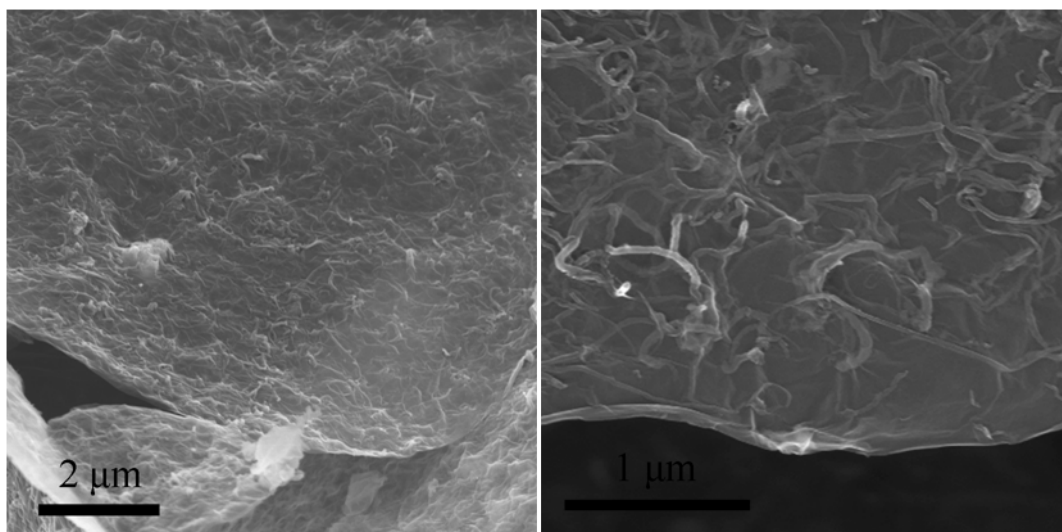

Fig S1 SEM images of CNT-GO composite before the addition of TTIP.

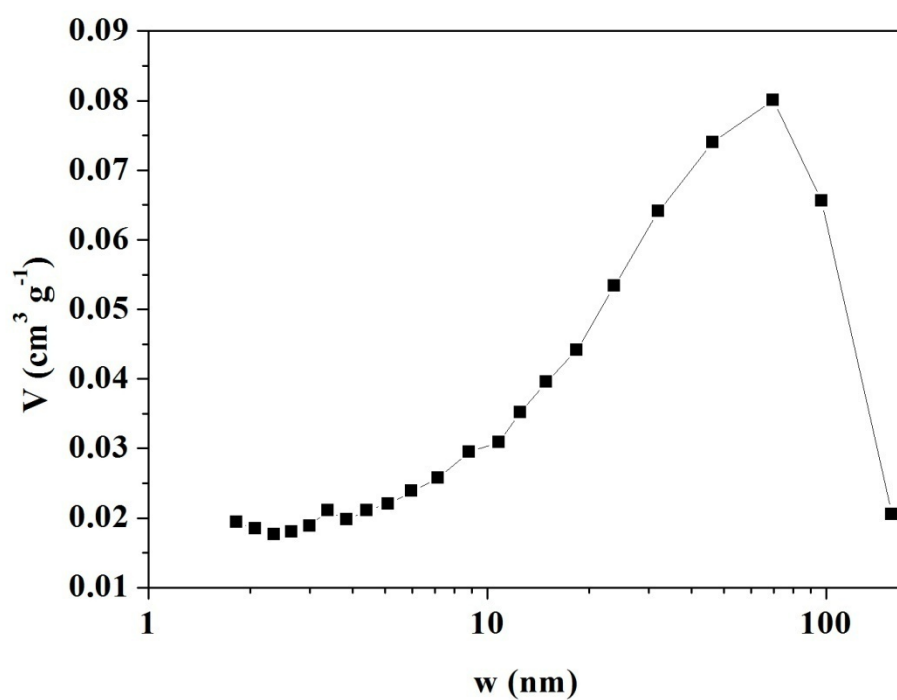

Fig S2 The pore-size distribution plot of TiO<sub>2</sub>(B).

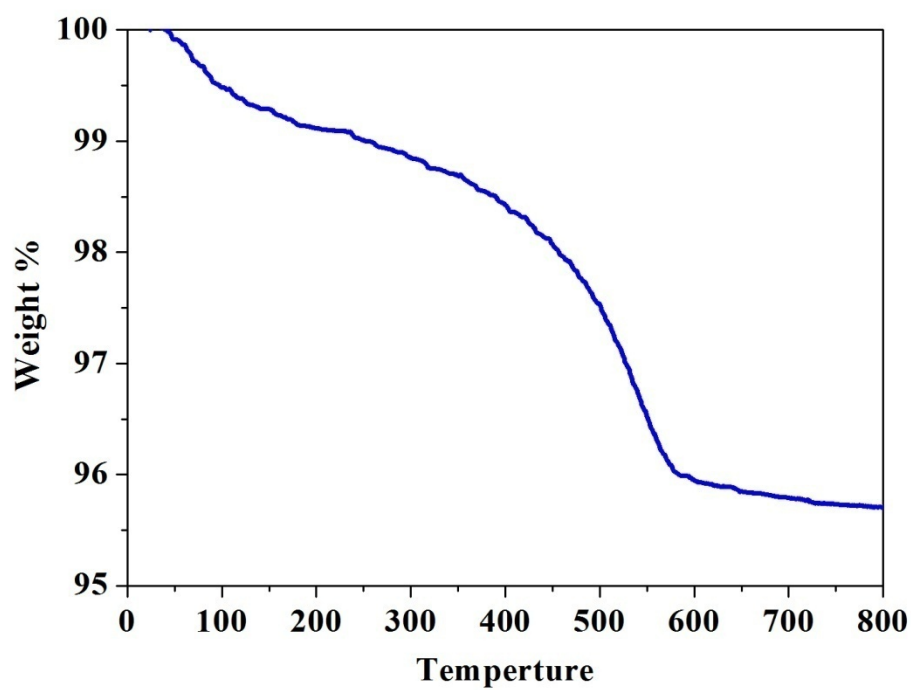

Fig S3 Thermogravimetric analysis of TiO<sub>2</sub>(B)/graphene.

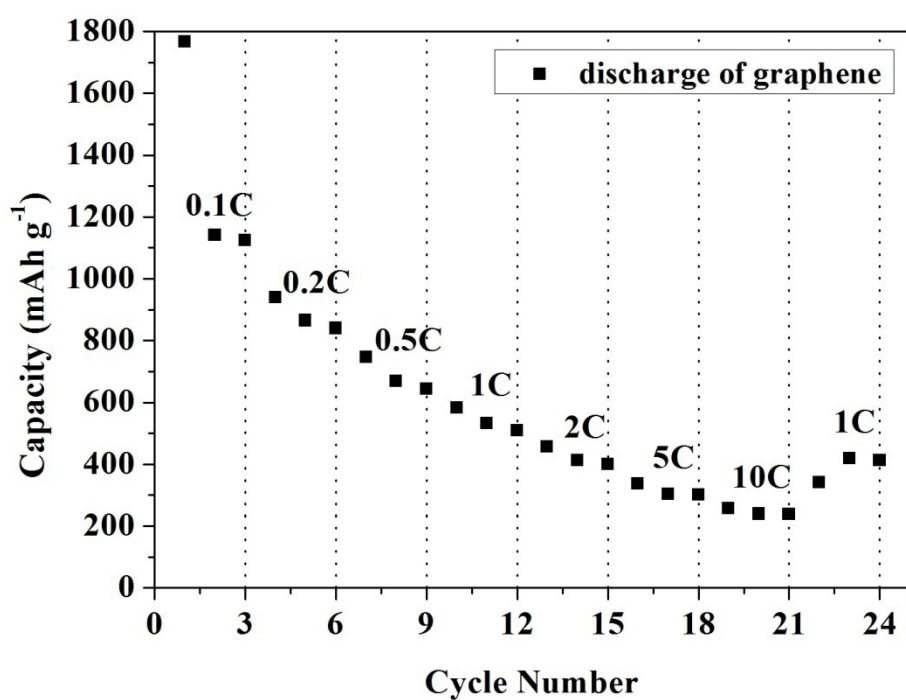

Fig S4 Curve for galvanostatic discharge of graphene at different rates.

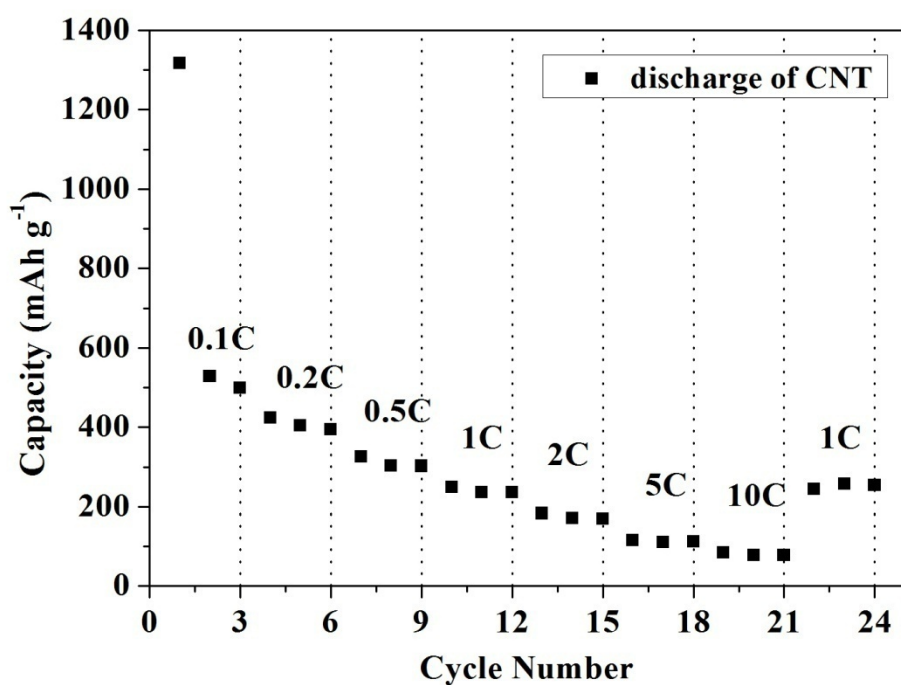

Fig S5 Curve for galvanostatic discharge of CNT at different rates.

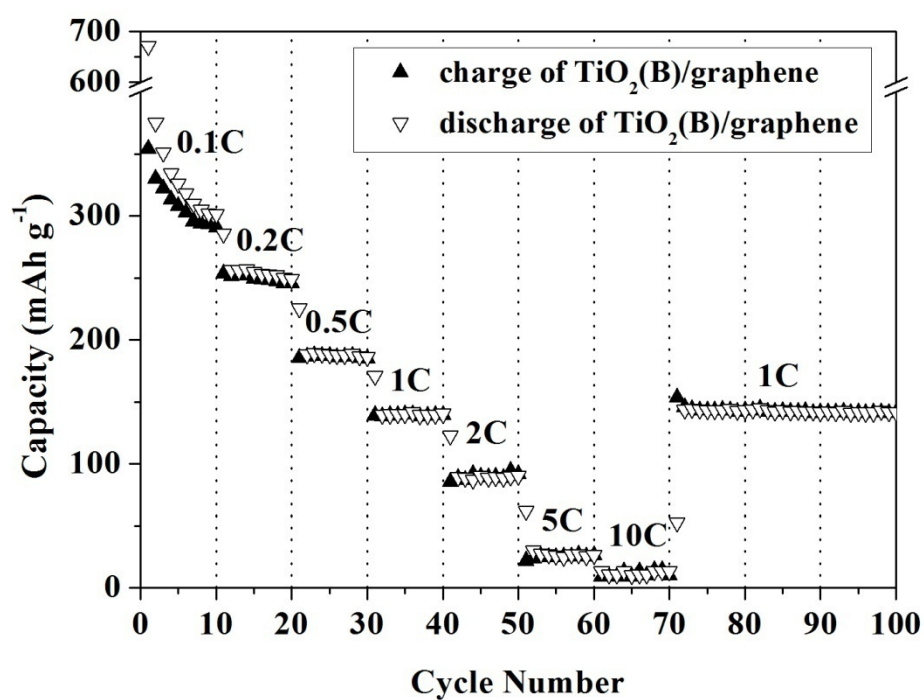

Fig S6 Curve for galvanostatic discharge of  $\text{TiO}_2(\text{B})/\text{graphene}$  composite at different rates.

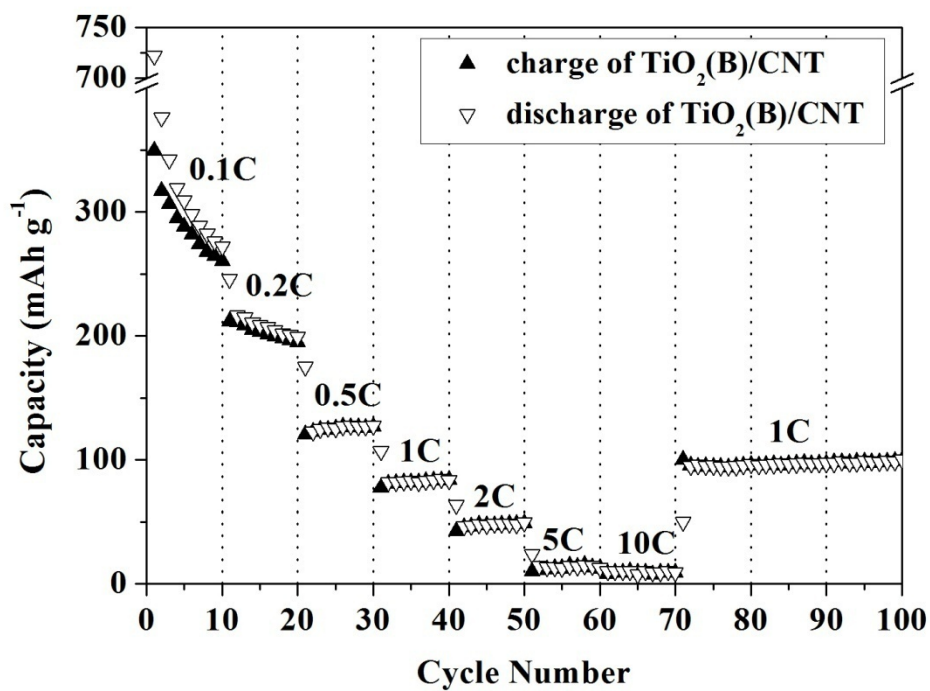

Fig S7 Curve for galvanostatic discharge of  $\text{TiO}_2(\text{B})/\text{CNT}$  composite at different rates.
